# Supplementary material for: Estimating vertical profiles of ice water content and snowfall rate from radar measurements in the G-band
Source: Copernicus journal article supplement (doi:10.5194/amt-18-7833-2025), 2025-12-22
Supplement: Supplementary file [file amt-18-7833-2025-supplement-title-page.pdf › amt-18-7833-2025-supplement-title-page.pdf]

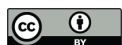

## *Supplement of*

# **Estimating vertical profiles of ice water content and snowfall rate from radar measurements in the G-band**

**Karina McCusker et al.**

*Correspondence to:* Karina McCusker (k.mccusker@reading.ac.uk)

- amt-18-7833-2025-supplement-title-page.pdf
- revised\_supplement
  - .DS\_Store
  - \_\_MACOSX
    - \* .\_revised\_supplement
    - \* revised\_supplement
  - data\_20230307.nc
  - data\_20240228.nc
  - readme.pdf

The copyright of individual parts of the supplement might differ from the article licence.
